# Supplementary material for: Intensification of IDegAsp Twice Daily (Adding Insulin Aspart vs. Switching To Basal–Bolus): Exploratory Randomized Trial in Type 2 Diabetes
Source: Springer Nature journal article supplement (doi:10.1007/s13300-016-0213-8), 2016-11-16
Supplement: MOESM1 [file 11053672]

**Supplemental material**

Table S1 Safety data

|  | IDegAsp BID + IAsp OD | IDeg OD + IAsp TID |
| --- | --- | --- |
| All patients | 20 | 20 |
| Number of patients with adverse events | 15 | 17 |
| Percentage of patients with adverse events | 75% | 85% |
| Number of adverse events | 33 | 45 |
| Adverse event rate per 100 PYE | 380 | 514 |
| Number of EAC confirmed cardiovascular events | 0 | 1 |
| Percentage of patients with EAC confirmed cardiovascular events | 0% | 5% |
| Number of patients with serious adverse events | 2 | 2 |
| Percentage of patients with serious adverse events | 10% | 10% |
| Number of serious adverse events | 2 | 3 |
| Serious adverse event rate per 100 PYE | 23 | 34 |
| Number of patients with withdrawn due to AEs | 0 | 1 |
| Percentage of patients withdrawn due to AEs. | 0% | 5% |

AEs, adverse events; EAC, event adjudication committee.

*The following events were evaluated and adjudicated by the EAC: acute coronary syndrome (ST elevation myocardial infarction, non-ST elevation myocardial infarction, unstable angina pectoris); stroke; cardiovascular death.
